# Supplementary material
Source: MDPI journal article supplement (https://www.mdpi.com/2311-7524/8/7/639)
Supplement: s1 [file s1]

**Table S1.** Fatty acid composition (%) of the studied roots of turnip-rooted parsley genotypes (mean±SD, *n*=3).

|          | Olomuńska   | Pólna       | Linga       | Halblange<br>Berlinska | Osborne     | Lenka       | Sonata      | Kaška       | Vistula     | Konika      |
|----------|-------------|-------------|-------------|------------------------|-------------|-------------|-------------|-------------|-------------|-------------|
| C6:0     | 0.193±0.001 | 0.086±0.006 | 0.034±0.001 | 0.028±0.001            | 0.069±0.001 | 0.080±0.003 | 0.030±0.001 | 0.028±0.002 | 0.039±0.001 | 0.026±0.001 |
| C8:0     | 0.642±0.002 | 0.149±0.003 | 0.061±0.001 | 0.051±0.001            | 0.078±0.004 | 0.166±0.004 | 0.055±0.003 | 0.043±0.003 | 0.065±0.004 | 0.054±0.002 |
| C10:0    | 0.596±0.004 | 0.417±0.003 | 0.223±0.003 | 0.343±0.001            | 0.603±0.002 | 0.315±0.004 | 0.197±0.008 | 0.234±0.005 | 0.175±0.001 | 0.371±0.002 |
| C13:0    | 0.528±0.003 | 0.320±0.002 | 0.206±0.004 | 0.332±0.001            | 0.770±0.001 | 0.316±0.001 | 0.179±0.008 | 0.213±0.004 | 0.169±0.001 | 0.38±0.03   |
| C14:0    | 0.226±0.001 | 0.206±0.002 | 0.218±0.004 | 0.159±0.001            | 0.215±0.001 | 0.184±0.003 | 0.167±0.004 | 0.154±0.003 | 0.209±0.004 | 0.153±0.002 |
| C15:0    | 0.803±0.001 | 0.630±0.003 | 0.630±0.002 | 0.619±0.003            | 0.598±0.004 | 0.639±0.004 | 0.577±0.006 | 0.580±0.001 | 0.550±0.009 | 0.527±0.004 |
| C16:0    | 25.25±0.03  | 21.11±0.02  | 21.96±0.02  | 21.1±0.8               | 22.73±0.01  | 22.4±0.5    | 21.46±0.04  | 21.4±0.1    | 23.30±0.01  | 22.4±0.2    |
| C16:1    | 0.664±0.002 | 0.316±0.004 | 0.419±0.006 | 0.303±0.003            | 0.349±0.005 | 0.283±0.002 | 0.271±0.007 | 0.28±0.01   | 0.381±0.004 | 0.301±0.002 |
| C17:0    | 0.892±0.005 | 0.427±0.006 | 0.266±0.005 | 0.350±0.006            | 0.26±0.04   | 0.152±0.002 | 0.143±0.001 | 0.370±0.002 | 0.370±0.002 | 0.497±0.008 |
| C18:0    | 1.847±0.002 | 1.29±0.01   | 1.23±0.01   | 1.12±0.02              | 1.25±0.01   | 1.05±0.01   | 1.04±0.01   | 1.14±0.01   | 0.980±0.003 | 1.03±0.01   |
| C18:1n9c | 6.9±0.3     | 10.43±0.02  | 5.83±0.06   | 5.57±0.07              | 6.64±0.06   | 8.6±0.1     | 6.81±0.09   | 6.74±0.01   | 7.29±0.01   | 5.7±0.2     |
| C18:2n6c | 47.9±0.2    | 50.86±0.01  | 54.57±0.08  | 55.6±0.6               | 53.43±0.01  | 55.0±0.4    | 57.1±0.2    | 53.4±0.2    | 53.91±0.01  | 56.59±0.3   |
| C18:3n3  | 5.89±0.07   | 6.86±0.03   | 7.33±0.02   | 6.71±0.03              | 6.45±0.06   | 5.12±0.01   | 5.54±0.04   | 9.63±0.01   | 6.90±0.01   | 6.17±0.01   |
| C20:0    | 0.407±0.005 | 0.410±0.006 | 0.426±0.006 | 0.406±0.006            | 0.458±0.005 | 0.428±0.004 | 0.43±0.01   | 0.40±0.01   | 0.391±0.007 | 0.309±0.005 |
| C20:1    | 0.183±0.001 | 0.152±0.002 | 0.179±0.006 | 0.149±0.008            | 0.186±0.004 | 0.214±0.006 | 0.142±0.002 | 0.193±0.001 | 0.187±0.004 | 0.169±0.002 |
| C20:2    | 0.255±0.006 | 0.470±0.007 | 0.179±0.005 | 0.192±0.002            | 0.180±0.004 | 0.168±0.004 | 0.152±0.003 | 0.175±0.003 | 0.145±0.003 | 0.142±0.001 |
| C21:0    | 0.119±0.004 | 0.361±0.003 | 0.241±0.001 | 0.269±0.002            | 0.248±0.004 | 0.190±0.001 | 0.159±0.003 | 0.125±0.002 | 0.117±0.006 | 0.173±0.001 |
| C22:0    | 1.45±0.01   | 1.00±0.01   | 1.19±0.01   | 0.923±0.024            | 1.20±0.01   | 0.862±0.005 | 1.03±0.01   | 0.849±0.001 | 0.86±0.01   | 0.669±0.006 |
| C20:5n3  | 2.59±0.01   | 2.23±0.02   | 2.55±0.01   | 3.98±0.02              | 2.26±0.06   | 2.22±0.01   | 2.74±0.01   | 2.35±0.01   | 2.44±0.01   | 3.19±0.01   |
| C23:0    | 0.424±0.004 | 0.61±0.01   | 0.630±0.003 | 0.47±0.04              | 0.591±0.002 | 0.47±0.02   | 0.33±0.01   | 0.44±0.02   | 0.419±0.004 | 0.359±0.001 |
| C24:0    | 2.19±0.01   | 1.67±0.04   | 1.64±0.01   | 1.35±0.01              | 1.44±0.02   | 1.19±0.01   | 1.43±0.02   | 1.25±0.01   | 1.10±0.01   | 0.813±0.004 |
| SFA      | 35.57±0.03  | 28.68±0.03  | 28.96±0.01  | 27.5±0.8               | 30.50±0.03  | 28.4±0.5    | 27.23±0.01  | 27.2±0.1    | 28.75±0.01  | 27.8±0.1    |
| MUFA     | 7.7±0.3     | 10.90±0.01  | 6.42±0.07   | 6.03±0.07              | 7.18±0.07   | 9.1±0.1     | 7.2±0.1     | 7.21±0.02   | 7.86±0.01   | 6.1±0.2     |
| PUFA     | 56.7±0.2    | 60.42±0.02  | 64.62±0.08  | 66.5±0.7               | 62.3±0.1    | 62.5±0.4    | 65.6±0.1    | 65.5±0.2    | 63.39±0.01  | 66.1±0.3    |

**Table S1. Cont.**

|          | Hanacka     | Halblange<br>Eagle | Cukrowa     | Alba        | Arat        | Root parsley (Common<br>variety) | Berlinski Halblange<br>Springer |
|----------|-------------|--------------------|-------------|-------------|-------------|----------------------------------|---------------------------------|
| C6:0     | 0.033±0.001 | 0.024±0.001        | 0.094±0.004 | 0.034±0.003 | 0.259±0.003 | 0.218±0.001                      | 0.129±0.008                     |
| C8:0     | 0.060±0.001 | 0.049±0.004        | 0.079±0.004 | 0.071±0.002 | 0.128±0.006 | 0.110±0.001                      | 0.069±0.001                     |
| C10:0    | 0.480±0.003 | 0.283±0.002        | 0.270±0.001 | 0.393±0.008 | 0.78±0.03   | 0.398±0.007                      | 0.17±0.01                       |
| C12:0    | 0.429±0.008 | 0.269±0.002        | 0.200±0.002 | 0.495±0.005 | 0.39±0.01   | 0.420±0.001                      | 0.299±0.003                     |
| C13:0    | 0.177±0.004 | 0.152±0.002        | 0.204±0.001 | 0.174±0.001 | 0.224±0.004 | 0.215±0.001                      | 0.192±0.001                     |
| C14:0    | 0.55±0.02   | 0.560±0.001        | 0.615±0.008 | 0.609±0.006 | 0.709±0.009 | 0.55±0.01                        | 0.442±0.002                     |
| C15:0    | 22.7±0.1    | 20.66±0.02         | 23.10±0.08  | 22.2±0.1    | 25.60±0.09  | 26.5±0.3                         | 24.1±0.2                        |
| C16:0    | 0.262±0.001 | 0.248±0.004        | 0.32±0.01   | 0.288±0.004 | 0.323±0.003 | 0.39±0.02                        | 0.352±0.002                     |
| C16:1    | 0.291±0.001 | 0.380±0.003        | 0.269±0.003 | 0.520±0.002 | 0.76±0.01   | 0.49±0.01                        | 0.360±0.001                     |
| C17:0    | 1.15±0.01   | 0.928±0.004        | 1.24±0.01   | 1.55±0.04   | 1.49±0.01   | 1.55±0.01                        | 1.07±0.04                       |
| C18:0    | 6.31±0.01   | 8.22±0.03          | 6.74±0.04   | 6.35±0.04   | 5.93±0.01   | 7.61±0.04                        | 7.41±0.01                       |
| C18:1n9c | 55.0±0.2    | 56.55±0.01         | 54.1±0.2    | 53.3±0.1    | 50.8±0.1    | 50.6±0.4                         | 54.1±0.3                        |
| C18:2n6c | 6.25±0.01   | 5.61±0.01          | 8.15±0.05   | 6.40±0.01   | 6.91±0.01   | 6.26±0.05                        | 7.78±0.06                       |
| C18:3n3  | 0.429±0.008 | 0.320±0.001        | 0.430±0.004 | 0.437±0.006 | 0.652±0.003 | 0.51±0.01                        | 0.411±0.002                     |
| C20:0    | 0.168±0.004 | 0.175±0.001        | 0.107±0.008 | 0.165±0.002 | 0.248±0.004 | 0.138±0.002                      | 0.103±0.004                     |
| C20:1    | 0.187±0.001 | 0.164±0.001        | 0.077±0.008 | 0.187±0.003 | 0.210±0.008 | 0.160±0.006                      | 0.146±0.005                     |
| C20:2    | 0.119±0.001 | 0.115±0.001        | 0.135±0.004 | 0.170±0.002 | 0.169±0.001 | 0.139±0.006                      | 0.108±0.006                     |
| C21:0    | 0.830±0.003 | 0.690±0.008        | 0.929±0.008 | 1.06±0.01   | 1.25±0.01   | 1.05±0.03                        | 0.797±0.009                     |
| C22:0    | 3.26±0.01   | 3.33±0.01          | 1.32±0.01   | 3.82±0.07   | 1.15±0.01   | 1.25±0.01                        | 0.87±0.03                       |
| C23:0    | 0.419±0.002 | 0.34±0.02          | 0.350±0.006 | 0.418±0.008 | 0.711±0.002 | 0.367±0.04                       | 0.27±0.02                       |
| C24:0    | 0.929±0.001 | 0.931±0.008        | 1.25±0.01   | 1.31±0.01   | 1.30±0.01   | 1.06±0.03                        | 0.93±0.01                       |

|      |          |            |            |            |            |           |           |
|------|----------|------------|------------|------------|------------|-----------|-----------|
| SFA  | 28.6±0.2 | 25.70±0.01 | 29.16±0.07 | 29.47±0.06 | 34.42±0.08 | 33.6±0.4  | 29.3±0.3  |
| MUFA | 6.7±0.1  | 8.65±0.02  | 7.17±0.05  | 6.80±0.03  | 6.50±0.02  | 8.14±0.06 | 7.86±0.01 |
| PUFA | 64.7±0.1 | 65.66±0.01 | 63.7±0.1   | 63.72±0.03 | 59.1±0.1   | 58.3±0.3  | 62.8±0.3  |

C6:0 – caproic acid; C8:0 – caprylic acid; C10:0 – capric acid; C13:0 – tridecanoic acid; C14:0 – myristic acid; C15:0 – pentadecanoic acid; C16:0 – palmitic acid; C16:1 – palmitoleic acid; C17:0 – heptadecanoic acid; C18:0 – stearic acid; C18:1n9c – oleic acid; C18:2n6c – linoleic acid; C18:3n3 – linolenic acid; C20:0 – arachidic acid; C20:1 – gadoleic acid; C20:2 – eicosadieoic acid; C21:0 – heneicosanoic acid; C22:0 – behenic acid; C20:5n3 – eicosapentaenoic acid; C23:0 – tricosanoic acid; C24:0 – lignoceric acid; SFA – saturated fatty acids; MUFA – monounsaturated fatty acids; PUFA – polyunsaturated fatty acids.

**Table S2.** Content (mg/g of extract) of the phenolic compounds identified in the hydroethanolic extracts of the studied roots of turnip-rooted parsley genotypes (mean±SD, *n*=3).

| Peak | Olomučka    | Pólna       | Linga       | Halblange<br>Berlinska | Osborne     | Lenka       | Sonata      | Kaška       | Vistula     |
|------|-------------|-------------|-------------|------------------------|-------------|-------------|-------------|-------------|-------------|
| 1    | 0.56±0.02   | 0.098±0.002 | 0.050±0.001 | tr                     | tr          | 0.031±0.002 | 0.016±0.001 | 0.037±0.002 | tr          |
| 2    | 0.52±0.02   | 0.127±0.002 | 0.117±0.001 | 0.074±0.002            | 0.034±0.002 | 0.130±0.002 | 0.134±0.002 | 0.096±0.002 | 0.085±0.005 |
| 3    | 0.42±0.03   | 0.093±0.001 | 0.104±0.006 | 0.070±0.002            | 0.016±0.001 | 0.150±0.002 | 0.118±0.002 | 0.102±0.004 | 0.071±0.002 |
| 4    | 0.41±0.01   | 0.078±0.001 | 0.051±0.001 | 0.042±0.001            | 0.033±0.001 | nd          | 0.063±0.001 | 0.055±0.001 | 0.052±0.001 |
| 5    | 3.7±0.1     | 0.492±0.001 | 0.484±0.001 | 0.471±0.001            | 0.451±0.001 | 0.483±0.001 | 0.57±0.004  | 0.477±0.001 | 0.463±0.001 |
| 6    | 0.88±0.02   | 0.487±0.001 | 0.491±0.001 | 0.477±0.001            | 0.470±0.001 | 0.475±0.001 | 0.472±0.001 | 0.478±0.001 | 0.477±0.001 |
| 7    | 1.64±0.03   | 1.484±0.002 | 1.32±0.01   | 1.274±0.003            | 1.27±0.01   | 1.29±0.01   | 1.31±0.01   | 1.35±0.01   | 1.29±0.01   |
| 8    | 0.661±0.001 | 0.551±0.002 | 0.493±0.002 | 0.479±0.001            | 0.472±0.001 | 0.472±0.001 | 0.537±0.002 | 0.520±0.004 | 0.494±0.002 |
| 9    | nd          | nd          | tr          | tr                     | tr          | tr          | nd          | tr          | nd          |
| 10   | nd          | 1.404±0.003 | 1.28±0.01   | 1.25±0.01              | 1.26±0.01   | 1.295±0.003 | 1.33±0.01   | 1.27±0.01   | 1.27±0.01   |
| 11   | nd          | 0.85±0.01   | 0.58±0.01   | 0.516±0.001            | 0.54±0.01   | nd          | 0±0         | 0.59±0.01   | nd          |
| 12   | nd          | 8.48±0.01   | 6.11±0.05   | 4.44±0.02              | 1.36±0.01   | 15.6±0.4    | 12.8±0.4    | 6.1±0.1     | 4.8±0.1     |
| 13   | 1.21±0.01   | 0.91±0.02   | 0.86±0.04   | 0.676±0.004            | 0.503±0.002 | 1.24±0.01   | 1.21±0.01   | 0.80±0.02   | 0.654±0.003 |
| 14   | 0.574±0.002 | 0.715±0.002 | nd          | 0.593±0.003            | 0.493±0.002 | 0.80±0.02   | 0.80±0.02   | 0.660±0.002 | 0.595±0.003 |
| 15   | 0.568±0.002 | 0.8±0.02    | 1.00±0.01   | 0.678±0.004            | 0.505±0.001 | 1.12±0.02   | 0.89±0.02   | 0.82±0.05   | 0.650±0.001 |
| 16   | 0.13±0.01   | 1.07±0.02   | 1.62±0.07   | 0.81±0.02              | 0.11±0.01   | 2.4±0.1     | 1.46±0.05   | 1.49±0.05   | 0.54±0.01   |
| 17   | 3.7±0.1     | 6.03±0.03   | 9.02±0.07   | 5.2±0.1                | 1.22±0.05   | 12.4±0.7    | 8.1±0.1     | 9.36±0.05   | 3.14±0.05   |
| 18   | 1.55±0.03   | 2.12±0.02   | 3.33±0.01   | 2.01±0.07              | 0.663±0.001 | 4.6±0.1     | 3.1±0.1     | 3.4±0.1     | 1.17±0.01   |
| 19   | 0.558±0.003 | 0.86±0.01   | 1.02±0.02   | 0.708±0.002            | 0.539±0.002 | 1.24±0.01   | 0.98±0.02   | 1.21±0.02   | 0.679±0.004 |
| TPA  | 1.9±0.1     | 0.40±0.01   | 0.32±0.01   | 0.145±0.003            | 0.08±0.01   | 0.311±0.002 | 0.33±0.01   | 0.29±0.01   | 0.21±0.01   |
| TF   | 13.6±0.1    | 23.4±0.1    | 25.0±0.1    | 17.0±0.2               | 7.32±0.03   | 41±1        | 31±0.5      | 25.97±0.3   | 13.7±0.1    |
| THT  | 1.64±0.03   | 2.89±0.01   | 2.60±0.01   | 2.52±0.01              | 2.53±0.01   | 2.59±0.01   | 2.63±0.01   | 2.62±0.01   | 2.56±0.01   |
| TPC  | 17.1±0.2    | 26.7±0.2    | 27.9±0.1    | 19.7±0.2               | 9.93±0.02   | 44±1        | 34.0±0.5    | 28.9±0.3    | 16.5±0.2    |

Table S2. Cont.

| Peak | Konika      | Hanacka     | Halblange Eagle | Cukrowa     | Alba        | Arat        | Root parsley (Common variety) | Berlinski Halblange Springer |
|------|-------------|-------------|-----------------|-------------|-------------|-------------|-------------------------------|------------------------------|
| 1    | 0.11±0.002  | 0.031±0.002 | nd              | 0.041±0.002 | tr          | 0.039±0.002 | 0.069±0.002                   | 0.058±0.005                  |
| 2    | 0.164±0.005 | 0.106±0.002 | 0.142±0.005     | 0.087±0.002 | 0.167±0.002 | 0.111±0.002 | 0.216±0.004                   | 0.224±0.002                  |
| 3    | nd          | 0.127±0.003 | 0.104±0.003     | 0.147±0.004 | nd          | 0.11±0.004  | nd                            | nd                           |
| 4    | 0.046±0.001 | 0.059±0.001 | 0.054±0.001     | 0.049±0.001 | 0.051±0.001 | 0.063±0.001 | 0.054±0.001                   | 0.046±0.001                  |
| 5    | 0.511±0.002 | 0.499±0.001 | 0.473±0.001     | 0.477±0.001 | 0.495±0.001 | 0.53±0.01   | 0.462±0.001                   | 0.47±0.01                    |
| 6    | 0.493±0.002 | 0.488±0.001 | 0.475±0.001     | 0.477±0.001 | 0.481±0.001 | 0.492±0.001 | 0.474±0.001                   | 0.485±0.004                  |
| 7    | 1.27±0.01   | 1.385±0.003 | 1.27±0.01       | 1.28±0.01   | 1.32±0.01   | 1.33±0.01   | 1.27±0.01                     | 1.24±0.01                    |
| 8    | 0.532±0.003 | 0.505±0.002 | 0.496±0.003     | nd          | nd          | 0.521±0.002 | 0.492±0.002                   | 0.490±0.003                  |
| 9    | tr          | nd          | nd              | tr          | nd          | tr          | nd                            | tr                           |
| 10   | nd          | 1.29±0.01   | 1.24±0.01       | 1.26±0.01   | 1.28±0.01   | 1.28±0.01   | 1.30±0.01                     | 1.23±0.01                    |
| 11   | nd          | 0.70±0.01   | nd              | nd          | nd          | nd          | nd                            | nd                           |
| 12   | 18.8±0.5    | 5.9±0.1     | 15±1            | 9.1±0.1     | 17.6±0.5    | 22±1        | 14.5±0.5                      | 24±1                         |
| 13   | 1.62±0.02   | 0.80±0.01   | 1.22±0.02       | 1.00±0.02   | 1.52±0.02   | 2.01±0.03   | 1.29±0.03                     | 2.16±0.02                    |
| 14   | 0.86±0.02   | 0.609±0.002 | 0.78±0.03       | 0.664±0.003 | 0.78±0.02   | 0.90±0.01   | 0.75±0.03                     | 0.92±0.01                    |
| 15   | 1.28±0.02   | 0.678±0.002 | 1.04±0.01       | 0.91±0.04   | 1.14±0.02   | 1.11±0.02   | 1.11±0.02                     | 1.23±0.02                    |
| 16   | 3.8±0.1     | 0.77±0.01   | 2.1±0.1         | 2.07±0.05   | 2.56±0.05   | 2.5±0.1     | 2.8±0.1                       | 3.48±0.1                     |
| 17   | 18.3±0.5    | 4.6±0.2     | 9.6±0.1         | 14.4±0.1    | 13±1        | 10±1        | 17±1                          | 15±1                         |
| 18   | 6.7±0.1     | 1.86±0.05   | 3.53±0.05       | 5.2±0.1     | 4.57±0.04   | 4.49±0.05   | 6.53±0.05                     | 7.36±0.04                    |
| 19   | 1.47±0.02   | 0.81±0.04   | 1.18±0.02       | 1.27±0.02   | 1.14±0.02   | 1.15±0.03   | 1.91±0.03                     | 1.53±0.02                    |
| TPA  | 0.32±0.01   | 0.32±0.01   | 0.304±0.01      | 0.323±0.002 | 0.229±0.003 | 0.32±0.01   | 0.34±0.01                     | 0.327±0.004                  |
| TF   | 54±1        | 18.2±0.4    | 36±1            | 36±1        | 43±1        | 46±1        | 48±2                          | 56±2                         |
| THT  | 1.27±0.01   | 2.67±0.01   | 2.51±0.01       | 2.54±0.01   | 2.60±0.01   | 2.6±0.01    | 2.56±0.01                     | 2.47±0.01                    |
| TPC  | 56±1        | 21.2±0.4    | 38±1            | 38±1        | 46±1        | 49±1        | 51±2                          | 59±2                         |

TPA: total phenolic acids; TF: total flavonoids; THT: total hydrolysable tannins; TPC: total phenolic compounds. The peak identification is provided in Table 6. Calibration curves used in the quantification: Standard calibration curves: caffeic acid ( $y = 388,345x + 406,369$ ,  $R^2 = 0.999$ , LLOD = 0.78 µg/mL and LLOQ = 1.97 µg/mL, peak 1); *p*-coumaric acid ( $y = 301,950x + 6966.7$ ,  $R^2 = 0.9999$ , LLOD = 0.68 µg/mL and LLOQ = 1.61

µg/mL, peaks 2 and 3); cinnamic acid ( $y = 1 \times 10^6 x - 222,204$ ,  $R^2 = 0.9993$  LLOD = 0.835 µg/mL and LLOQ = 2.51 µg/mL, peak 4); apigenin-7-O-glucoside ( $y = 10,683x - 45,794$ ,  $R^2 = 0.996$ , LLOD = 136.95 µg/mL and LLOQ = 414.98 µg/mL, peaks 5, 11, 12, 17 and 18); quercetin-3-O-glucoside ( $y = 34,843x - 160,173$ ,  $R^2 = 0.9998$ , LLOD = 0.21 µg/mL and LLOQ = 0.71 µg/mL, peaks 6, 8, 13–15 and 19); ellagic acid ( $y = 26,719x - 317,255$ ,  $R^2 = 0.9986$ , LLOD = 41.20 µg/mL and LLOQ = 124.84 µg/mL, peaks 7 and 10); naringenin ( $y = 18,433x + 78,903$ ,  $R^2 = 0.9998$ , LLOD = 18.66 µg/mL and LLOQ = 56.55 µg/mL, peak 9); apigenin-6-C-glucoside ( $y = 107,025x + 61,531$ ,  $R^2 = 0.9989$ , LLOD = 0.19 µg/mL and LLOQ = 0.63 µg/mL, peak 16).
